# Supplementary material
Source: PubMed Central journal article supplement (PMC2224197)
Supplement: pnas_0710779105_4.pdf [file pnas_0710779105_4.pdf]

**A****Single-step binding model**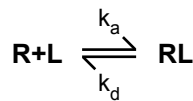

|        | dsRNA length (bp) | $k_a$ (M*s) <sup>-1</sup> x10 <sup>-2</sup> | $k_d$ (s) <sup>-1</sup> x10 <sup>4</sup> |
|--------|-------------------|---------------------------------------------|------------------------------------------|
| pH 5.5 | 39                | 2150 (30)                                   | 156 (2)                                  |
|        | 48                | 2860 (20)                                   | 38.9 (0.5)                               |
|        | 139               | 4070 (40)                                   | 37.4 (0.5)                               |
|        | 540               | 3730 (20)                                   | 17.3 (0.3)                               |
| pH 6.0 | 39                | 1780 (40)                                   | 907 (20)                                 |
|        | 48                | 1490 (30)                                   | 232 (5)                                  |
|        | 139               | 1870 (20)                                   | 59.2 (0.6)                               |
|        | 540               | 1660 (20)                                   | 46.8 (0.9)                               |
| pH 6.5 | 39                | 189 (3)                                     | 425 (6)                                  |
|        | 48                | 297 (5)                                     | 776 (11)                                 |
|        | 139               | 394 (5)                                     | 192 (2)                                  |
|        | 540               | 293 (3)                                     | 229 (2)                                  |

**B****Cooperative binding model**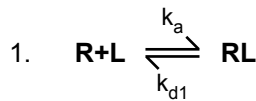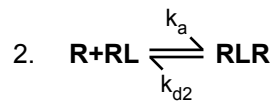

|        | dsRNA length (bp) | $k_a$ (M*s) <sup>-1</sup> x10 <sup>-3</sup> | $k_{d1}$ (s) <sup>-1</sup> x10 <sup>3</sup> | $k_{d2}$ (s) <sup>-1</sup> x10 <sup>5</sup> |
|--------|-------------------|---------------------------------------------|---------------------------------------------|---------------------------------------------|
| pH 5.5 | 39                | 2250 (60)                                   | 1890 (90)                                   | 1360 (10)                                   |
|        | 48                | 3070 (100)                                  | 1580 (110)                                  | 286 (3)                                     |
|        | 139               | 1710 (110)                                  | 314 (42)                                    | 292 (5)                                     |
|        | 540               | 2990 (150)                                  | 1020 (110)                                  | 121 (2)                                     |
| pH 6.0 | 39                | 625 (20)                                    | 820 (45)                                    | 8950 (120)                                  |
|        | 48                | 2740 (30)                                   | 7360 (160)                                  | 1860 (14)                                   |
|        | 139               | 746 (36)                                    | 213 (21)                                    | 482 (7)                                     |
|        | 540               | 907 (28)                                    | 345 (22)                                    | 343 (4)                                     |
| pH 6.5 | 39                | 82.8 (3.2)                                  | 329 (22)                                    | 3770 (50)                                   |
|        | 48                | 133 (5)                                     | 615 (39)                                    | 6050 (80)                                   |
|        | 139               | 270 (5)                                     | 595 (21)                                    | 1580 (10)                                   |
|        | 540               | 146 (4)                                     | 377 (19)                                    | 2010 (10)                                   |

**Table 2** Rate constants for TLR3-dsRNA binding. Kinetic data from surface plasmon resonance experiments were fit to either a simple single-step model (A) or a cooperative binding model (B) using BIAevaluation 4.1 software (BIAcore/ GE Healthcare) to calculate association ( $k_a$ ) and dissociation ( $k_d$ ) constants. Each model is described diagrammatically above (R = TLR3, L = dsRNA). In the cooperative model, the association rate constants for both reactions are equivalent ( $k_a$ ), but the dissociation rate constants are independent of one another. The standard error associated with each calculation is indicated in parentheses.
