# Supplementary material
Source: PubMed Central journal article supplement (PMC2224197)
Supplement: pnas_0710779105_6.pdf [file pnas_0710779105_6.pdf]

## Appendix 2. Supplemental methods

### I. Details of vector construction

The TLR3/TLR4 chimera was constructed by introducing a novel *AseI* site between the TLR3ecd and the TLR4 transmembrane and intracellular domains by PCR. Note that this method mutates the first amino acid of TLR4 from isoleucine (I) to leucine (L), which is expected to largely conserve local structure. Three products were ligated together to make pUNO hTLR3/4: 1) *AseI/NheI*-digested PCR of hTLR4 sequences from pUNO hTLR4 (Invivogen), 2) *ClaI/AseI*-digested PCR of a portion of hTLR3 from pUNO hTLR3 (Invivogen) and 3) *NheI/ClaI*-digested pUNO vector. PCR primers used were:

| Oligo name            | Sequence (5' to 3')         |
|-----------------------|-----------------------------|
| TLR3_ <i>ClaI</i> (+) | TCCAACGGCTTTGACG            |
| TLR3_ <i>AseI</i> (-) | ATTAATAGTTCAAAGGGGGGCACTGTC |
| TLR4_ <i>AseI</i> (+) | ATTAATTGGTGTGTCCGGTCC       |
| TLR4_ <i>NheI</i> (-) | GCTAGCTCAGATAGATGTTGCTTCC   |

The NF- $\kappa$ B-responsive NEE (NF- $\kappa$ B-ELAM-EGFP) reporter cassette was constructed by excising the luciferase gene from the pNifty2-Luc reporter plasmid (Invivogen) using *NheI/NcoI* and replacing it with EGFP from pEGFP-N3 (BD Biosciences) cut with *NcoI/XbaI*. The NEE cassette was cut with *EcoRI/NotI* and subcloned into the lentivector pLenti6.2/V5-Dest (Invitrogen), which was cut with *PspOMI* and *EcoRI*. The extraneous CMV promoter was removed by digestion with *BamHI* and *ClaI*, blunting with Klenow, and self-ligation to yield pLenti6.2/NEE. The lentiviral vector HIV CS CN, which contains a CMV-Neo<sup>R</sup> cassette inserted into the HIV CS vector (1), was used for transgene introduction. The hEF1-HTLV TLR3 expression cassette was cut from pUNO hTLR3 with *PvuI/NheI*, HIV CS CN was cut with *SacII/BamHI*, and both products were blunted with Klenow and ligated to yield HIV CS TLR3 CN. Similarly, HIV CS TLR3/4 CN was constructed from pUNO hTLR3/4.

### II. Synthesis of dsRNA oligonucleotides

Sense and antisense templates were constructed for each dsRNA ligand. Templates for dsRNA 35 bp and shorter were created by synthesizing a DNA oligonucleotide containing the T7 promoter followed by the RNA-encoding sequence and annealing it to a complementary DNA oligonucleotide. For larger ligands, each template was constructed by amplifying a portion of the pFastBac-CPrME plasmid (2) by PCR, ligating the PCR product into the pGEM-T Easy plasmid (Promega) in each orientation, and linearizing the resulting plasmids with *NdeI*. Oligonucleotides used for annealing and as PCR primers were:

| <b>Oligo name</b>                                                     | <b>Sequence (5' to 3')</b> |
|-----------------------------------------------------------------------|----------------------------|
| <i>PCR primers for amplifying dsRNA templates from pFastBac-CPrME</i> |                            |
| Universal(+)                                                          | CTGCGGATTATTTGGC           |
| 62bp(-)                                                               | GAGCAGGCAAATTTGG           |
| 90bp(-)                                                               | CAAGATGGTTCTTCC            |
| 139bp(-)                                                              | TAGTTGGTCCATGGAC           |
| 532bp(-)                                                              | CAACTTGACAGTGTTC           |

|                                                                                |                                          |
|--------------------------------------------------------------------------------|------------------------------------------|
| <i>Oligos for annealing as dsRNA templates, to be ligated into pGEM-T Easy</i> |                                          |
| 39bp_template(+)                                                               | CTGCGGATTATTTGGCAAAGGAAGCATTGAC          |
| 48bp_template(+)                                                               | CTGCGGATTATTTGGCAAAGGAAGCATTGACACATGCGCC |

|                                                                                |                                                                 |
|--------------------------------------------------------------------------------|-----------------------------------------------------------------|
| <i>Oligos for direct dsRNA synthesis (contain T7 promoter and initial 'G')</i> |                                                                 |
| T7_25bp_sense(+)                                                               | GGATCCTAATACGACTCACTATAGCTGCGGATTATTTGGCAAAGGAAGC               |
| T7_25bp_antisense(+)                                                           | GGATCCTAATACGACTCACTATAGGCTTCCTTTGCCAAATAATCCGCAG               |
| T7_29bp_sense(+)                                                               | GGATCCTAATACGACTCACTATAGTGCAGGATTATTTGGCAAAGGAAGCA<br>TTGA      |
| T7_29bp_antisense(+)                                                           | GGATCCTAATACGACTCACTATAGTCAATGCTTCCTTTGCCAAATAATCC<br>GCA       |
| T7_35bp_sense(+)                                                               | GGATCCTAATACGACTCACTATAGCTGCGGATTATTTGGCAAAGGAAGC<br>ATTGACACAT |
| T7_35bp_antisense(+)                                                           | GGATCCTAATACGACTCACTATAGATGTGTCAATGCTTCCTTTGCCAAAT<br>AATCCGCAG |

All PCR reactions utilized the same forward primer, Universal(+). Each of the oligonucleotides listed under “Oligos for annealing as dsRNA templates...” and “Oligos for direct dsRNA synthesis...” was annealed to an exactly complementary partner DNA oligonucleotide (not shown here). dsRNA synthesis was carried out using the T7 Ribomax kit (Promega), as per the manufacturer’s instructions. Note that all templates to be cloned into the pGEM-T Easy plasmid are 8 bp shorter than the final dsRNA product. In this vector, four self-complementary plasmid-derived bases flank the dsRNA template (GATT-Template-AATC), and these bases (but not other plasmid sequences) pair during sense/antisense ssRNA annealing and, therefore, resist RNase A digestion (which is part of the synthesis procedure) and remain as part of the final dsRNA product. Mfold software (version 3.2) (3, 4) did not predict any stable alternative secondary structures for any of these sequences (data not shown).

### **References**

1. Miyoshi H, Blomer U, Takahashi M, Gage F H, Verma I M (1998) Development of a self-inactivating lentivirus vector. *J Virol* 72: 8150-7.
2. Qiao M *et al.* (2004) Induction of sterilizing immunity against West Nile Virus (WNV), by immunization with WNV-like particles produced in insect cells. *J Infect Dis* 190: 2104-8.
3. Mathews D H, Sabina J, Zuker M, Turner D H (1999) Expanded sequence dependence of thermodynamic parameters improves prediction of RNA secondary structure. *J Mol Biol* 288: 911-40.
4. Zuker M (2003) Mfold web server for nucleic acid folding and hybridization prediction. *Nucleic Acids Res* 31: 3406-15.
