# Supplementary material
Source: PubMed Central journal article supplement (PMC2224197)

**A**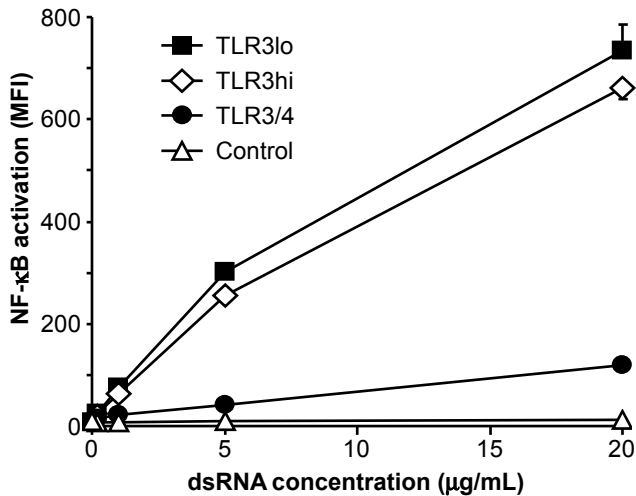**B**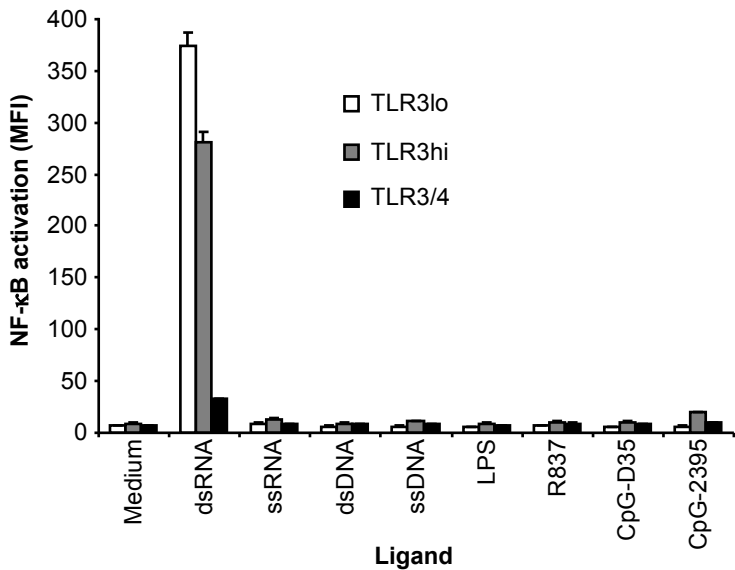

Supplement: pnas_0710779105_1.pdf [file pnas_0710779105_1.pdf]

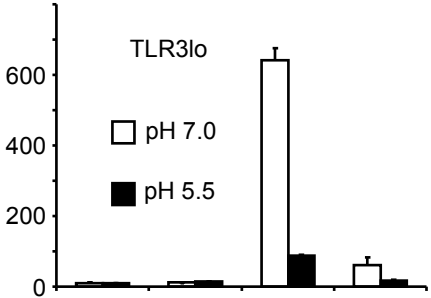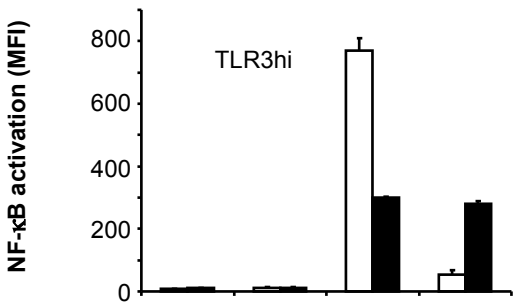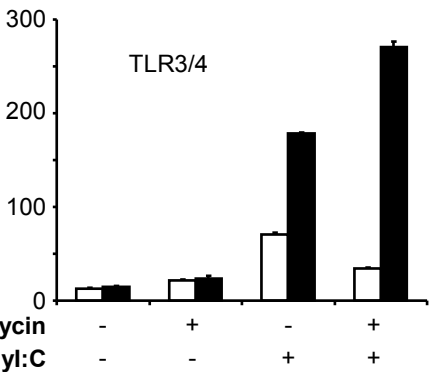

Supplement: pnas_0710779105_2.pdf [file pnas_0710779105_2.pdf]

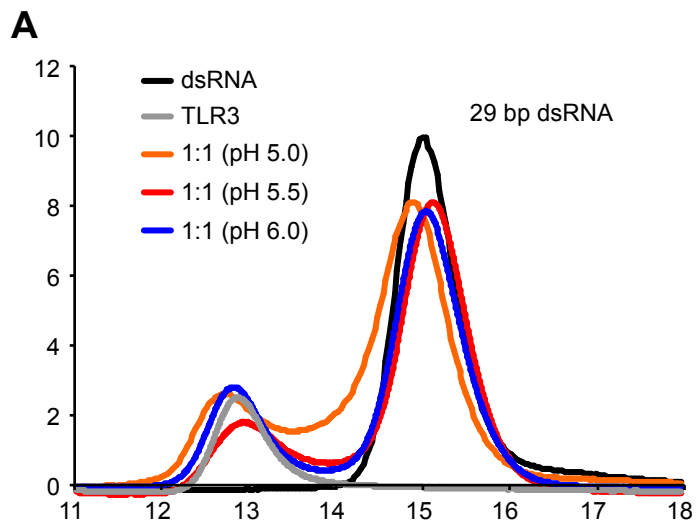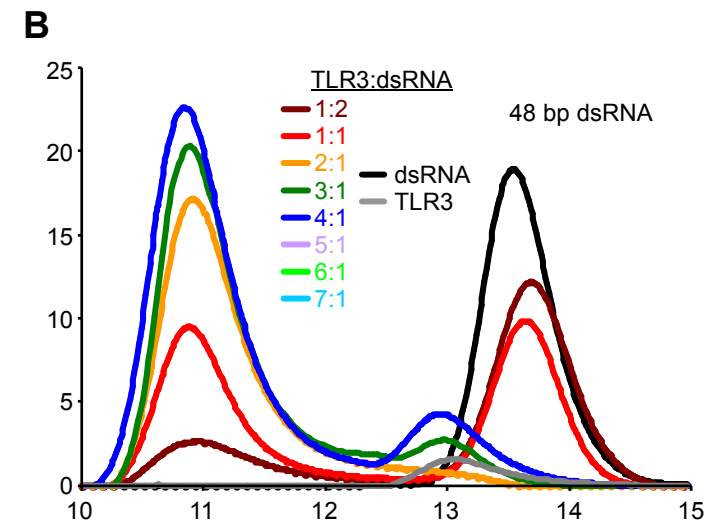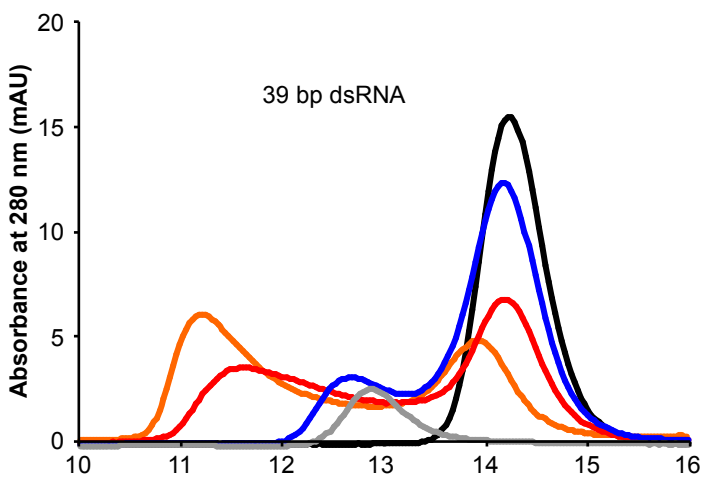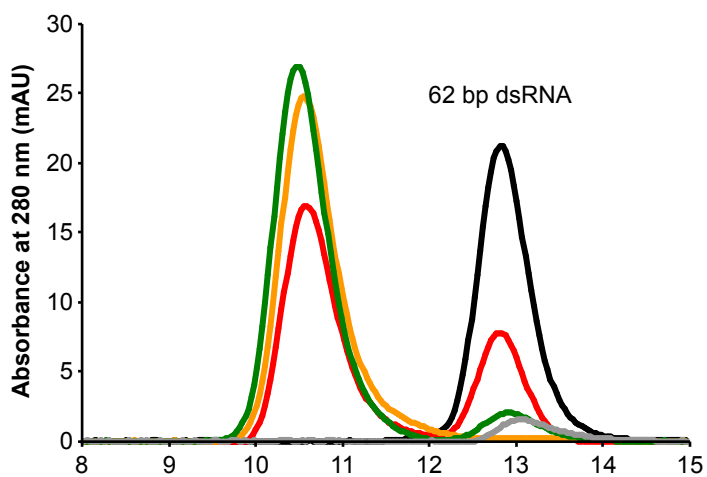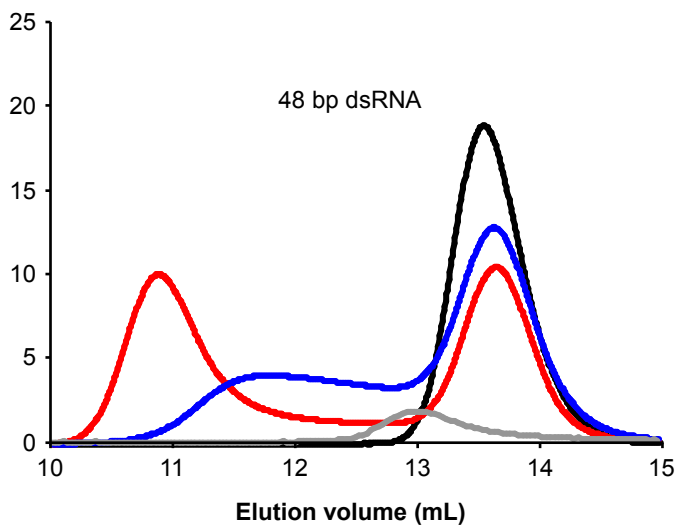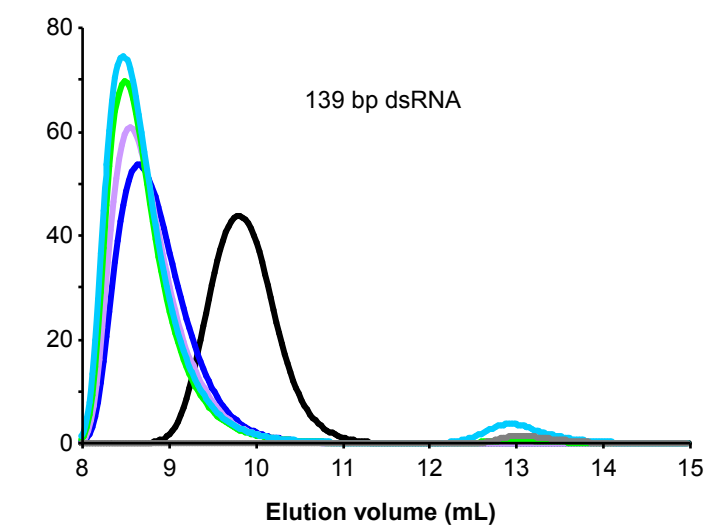

Supplement: pnas_0710779105_3.pdf [file pnas_0710779105_3.pdf]
